# Supplementary material for: The Prediction Analysis of Microarray 50 (PAM50) Gene Expression Classifier Utilized in Indeterminate-Risk Breast Cancer Patients in Hungary: A Consecutive 5-Year Experience
Source: MDPI journal article supplement (doi:10.3390/genes14091708), 2023-08-28
Supplement: s1 [file s1]

# The Prediction Analysis of Microarray 50 (PAM50) gene expression classifier utilized in indeterminate-risk breast cancer patients in Hungary: a consecutive 5-year experience.

Magdolna Dank, Dorottya Mühl, Annamária Pölhös, Renata Csanda, Magdolna Herold, Attila Kristof Kovacs, Lilla Madaras, Janina Kulka, Timea Palhazy, Anna-Maria Tokes, Monika Toth, Mihaly Ujhelyi, Attila Marcell Szasz\* and Zoltan Herold\*

**Table S1.** Clinical and histopathological data of study participant who died during the observational period of the study.

| Patient ID | Age at PAM50 sampling | Sample type | Survival time (month) | Primary or recurrent | TNM stage | IHC subtype   | PAM50 subtype | ROR score (risk category) | 10-year recurrence risk score |
|------------|-----------------------|-------------|-----------------------|----------------------|-----------|---------------|---------------|---------------------------|-------------------------------|
| Patient 3  | 66.6                  | Surgical    | 39.6                  | Primary              | T3N2M0    | Luminal B     | HER2-positive | 81 (high)                 | 43                            |
| Patient 10 | 84.6                  | Surgical    | 54.7                  | Primary              | T1N1M1    | Luminal B     | Luminal B     | 39 (moderate)             | 15.33                         |
| Patient 27 | 60.9                  | Surgical    | 28.4                  | Recurrent            | T1N0M1    | HER2-positive | HER2-positive | 67 (high)                 | 19                            |
| Patient 39 | 62.9                  | Core biopsy | 40.3                  | Primary              | NA        | HER2-positive | HER2-positive | 66 (high)                 | 28                            |
| Patient 40 | 33.1                  | Surgical    | 18.8                  | Primary              | T1N2M0    | Luminal B     | Basal-like    | 9 (high)                  | 43                            |

IHC: immunohistochemistry; PAM50: Prosigna® Prediction Analysis of Microarray 50 gene expression testing kit; ROR: risk of recurrence; TNM: tumor – node – metastasis.

\* These authors contributed equally to this study and shared the senior authorship.
